# Supplementary material for: Integrated analysis of plasma proteome and cortex single-cell transcriptome reveals the novel biomarkers during cortical aging
Source: Front Aging Neurosci. 2023 Jul 19;15:1063861. doi: 10.3389/fnagi.2023.1063861 (PMC10394382; doi:10.3389/fnagi.2023.1063861)
Supplement: Supplementary file 1 [file Data_Sheet_1.xlsx]

## Sheet: Supplementary Table 1
Supplementary Table 1 : The basic information of the participant used for single-nucleus transcriptome sequencing. Clinical traits of the individuals involved in this study, including age, gender, post mortem interval (PMI), diagnosis, ApoE genotype and amyloid pathology.
Stage	Age	Sex	Dataset	Mean	SD	Tangle.Stage	Diagnosis	APOE	PMI
stage1	44	M	GSE141552	53.5	6.40312	None	Control	None	50
	56	M	GSE141552			None	Control	None	19
	56	M	GSE141552			None	Control	None	19
	58	M	GSE141552			None	Control	None	68
stage2	69	M	GSE141552	75	4.54606	None	Control	None	52
	74	F	GSE157827			None	Control	33	39.5
	78	M	GSE157827			None	Control	33	51.5
	79	F	GSE157827			None	Control	33	48
stage3	85	M	GSE157827	89.6667	3.4448	None	Control	33	30.5
	87	M	GSE157827			None	Control	33	24
	89	M	GSE157827			None	Control	34	54.5
	90	M	GSE157827			None	Control	23	5.5
	93	M	GSE157827			None	Control	23	34.5
	94	F	GSE157827			None	Control	34	29.5

## Sheet: Supplementary Table 2
Supplementary Table 2 : The cluster and cel type were identified in the PFC.
Cluster	Cell type
c0	Astros
c1	Oligos
c2	Oligos
c3	Ex
c4	Ex
c5	OPC
c6	Ex
c7	Micro
c8	Inhib
c9	Inhib
c10	Ex
c11	Ex
c12	Inhib
c13	Inhib
c14	Ex
c15	Endo
c16	Oligos
c17	Astros
c18	Astros
c19	Micro
c20	Micro
c21	Astros
Cell type	Cell type	Marker gene
oligodendrocytes	Oligos	MBP, MOG, PLP1, MOBP, MAG
excitatory	Ex	CAMK2A, NRGN,SATB2, SLC17A7
OPC	OPC	VCAN, OLIG1, OLIG2, PCDH15, PDGFRA
microglia	Micro	C3, CSF1R, CD74, CX3CR1
inhibitory	Inhib	GAD1, GAD2
astrocyte	Astros	GLUL, SOX9, AQP4, GJA1, NDRG2, GFAP, ALDH1A1, ALDH1L1
endothelial	Endo	CLDN5, FLT

## Sheet: Supplementary Table 3
Supplementary Table 3 : The cell number and percentage of cell number.
Cell number
	stage1				stage2				stage3
Cell type	age44	age56	age56	age58	age69	age74	age78	age79	age85	age87	age89	age90	age93	age94	total
Astros	242	257	164	23	608	1733	1904	262	262	110	884	375	931	874	8629
Endo	117	53	41	4	43	57	40	83	83	18	49	51	43	111	793
Ex	2701	1386	1574	998	2720	1656	2898	2350	2355	26	308	521	1082	1731	22306
Inhib	527	305	465	317	667	1180	1148	1297	1296	27	134	735	634	701	9433
Micro	90	109	46	16	480	29	753	313	313	93	61	255	583	1165	4306
Oligos	229	292	172	35	779	1616	3575	369	365	281	675	1447	679	4109	14623
OPC	58	31	72	19	150	951	584	652	652	152	381	234	623	415	4974
Total	3964	2433	2534	1412	5447	7222	10902	5326	5326	707	2492	3618	4575	9106	65064
Percentage of cell number
	stage1				stage2				stage3
Cell type	age44	age56	age56	age58	age69	age74	age78	age79	age85	age87	age89	age90	age93	age94	total
Astros	6.10494	10.5631	6.47198	1.6289	11.1621	23.9961	17.4647	4.91926	4.91926	15.5587	35.4735	10.3648	20.3497	9.59807	13.2623
Endo	2.95156	2.17838	1.618	0.283286	0.789425	0.789255	0.366905	1.55839	1.55839	2.54597	1.96629	1.40962	0.939891	1.21898	1.2188
Ex	68.1382	56.9667	62.1152	70.6799	49.9357	22.9299	26.5823	44.1232	44.217	3.67751	12.3596	14.4002	23.6503	19.0094	34.2832
Inhib	13.2947	12.536	18.3504	22.4504	12.2453	16.339	10.5302	24.3522	24.3335	3.81895	5.37721	20.3151	13.8579	7.69822	14.498
Micro	2.27043	4.48007	1.81531	1.13314	8.81219	0.401551	6.90699	5.87683	5.87683	13.1542	2.44783	7.04809	12.7432	12.7938	6.6181
Oligos	5.77699	12.0016	6.78769	2.47875	14.3015	22.3761	32.7921	6.92828	6.85317	39.7454	27.0867	39.9945	14.8415	45.1241	22.4748
OPC	1.46317	1.27415	2.84136	1.34561	2.75381	13.1681	5.35682	12.2418	12.2418	21.4993	15.2889	6.46766	13.6175	4.55743	7.64478
Total	100	100	100	100	100	100	100	100	100	100	100	100	100	100	100

## Sheet: Supplementary Table 4
Supplementary Table 4 :Cell-specific differentially expressed genes
stage1 > stage2 > stage3								stage1 < stage2 < stage3
Astros-down	Endo-down	Ex-down	Inhib-down	Micro-down	Oligos-down	OPC-down		Astros-up	Endo-up	Ex-up	Inhib-up	Micro-up	Oligos-up	OPC-up
DPP10	THSD4	MBP	ERBB4	DIAPH2	CTNNA3	VCAN		RBFOX1	RGS5	0	0		0	0
GPC5	HIP1	ERBB4	IQCJ-SCHIP1	ARHGAP24	NKAIN2	NCKAP5		LAMA2	HES4			SPOCK3
	CADPS2	GALNTL6	NKAIN2	AC244021.1	PDE1A	SLC1A2		DSCAM	ADGRD1			DPYD
	SLIT3	CBLN2	LRRC4C	SRGAP2	PLP1	GPC6		GRIP1	COL6A2			LAPTM5
	ST6GALNAC3	TMSB10	IL1RAPL2	PLXDC2	ST18	FRMD4A		AEBP1	APOLD1			CNTN2
	ELOVL7	KCTD16	TMEM132C	LINC00278	POLR2F	BCAS1			IFITM3
		CA10	ZNF804A	KHDRBS3					PTH1R
		GPC6	RELN	ATP8B4					MT2A
		ENC1	FRMD4A	HDAC9					ATP1A2
		DGKB	PTPRG	APBB1IP					SLC6A1
		NRGN	ANO4	DOCK8					B2M
		SLC1A2	STXBP5L						APOE
		STXBP5L	KIRREL3						GFAP
		CDH13	MDGA2
		ST6GALNAC5	INPP4B
		GRID2	LRFN5
			NEAT1
			SOX5
			DSCAM
			KCNIP4
			DLGAP2
			SOX6
			PLCL1

## Sheet: Supplementary Table 5
Supplementary Table 5 :The differentially expressed genes for Astros from stage1 versus stage2
	p_val	avg_log2FC	pct.1	pct.2	p_val_adj
KAT2B	1.85e-22	0.835132	0.872	0.612	2.05e-19
ZNF98	5.66e-17	0.762121	0.948	0.756	6.29e-14
MAML2	2.24e-07	0.737922	1	0.899	0.000249394
TNIK	3.73e-09	0.735429	0.996	0.923	4.15e-06
PREX2	1.7e-09	0.73286	0.985	0.822	1.89e-06
ERBB4	8.05e-20	0.721073	1	0.96	8.95e-17
BMPR1B	8.37e-10	0.713431	1	0.828	9.31e-07
AC002429.2	2.13e-08	0.707894	0.77	0.604	2.37e-05
AQP4	2.41e-05	0.706968	1	0.863	0.0267982
PAMR1	3.99e-11	0.702515	0.821	0.591	4.44e-08
ITPR2	2.43e-05	0.661541	0.971	0.823	0.0270231
ZBTB20	2.69e-07	0.627892	1	0.981	0.000299183
GLUL	0.000641814	0.60886	0.996	0.865	0.713698
RNF219-AS1	1.51e-25	0.597953	0.988	0.837	1.68e-22
CRB1	4.98e-05	0.595307	0.999	0.812	0.0553592
SOX6	2.28e-05	0.579457	1	0.806	0.02532
NHSL1	1.86e-15	0.559276	0.994	0.864	2.06e-12
NEAT1	0.0107084	0.558942	1	0.979	1
PARD3	8.78e-07	0.552156	0.997	0.873	0.000976596
LINC01266	7.18e-16	0.545506	0.589	0.243	7.99e-13
ZEB1	1.48e-27	0.544236	0.984	0.607	1.65e-24
ADGRV1	1.42e-13	0.527666	1	0.979	1.58e-10
FBXL7	0.0351893	0.520104	0.997	0.902	1
HPSE2	4.68e-08	0.50779	0.98	0.902	5.2e-05
LINC00299	4.27e-15	0.506467	0.929	0.767	4.75e-12
RGS20	8.91e-09	0.50161	0.856	0.594	9.91e-06
SAT1	0.198574	0.494387	0.761	0.647	1
SLC4A4	1.23e-17	0.491535	0.985	0.864	1.37e-14
AL589740.1	0.282696	0.473944	0.999	0.884	1
KCNIP1	0.000136258	0.473695	0.44	0.242	0.151519
RUBCNL	7.32e-30	0.460556	0.698	0.37	8.14e-27
LRIG1	1.15e-07	0.453414	0.956	0.828	0.00012836
SFXN5	0.00359257	0.452579	0.948	0.799	1
EGFR	2.29e-12	0.452109	0.918	0.661	2.54e-09
RANBP3L	1.49e-07	0.45068	0.977	0.738	0.000165833
KCNMB2-AS1	2.45e-17	0.444845	0.845	0.595	2.73e-14
SLC15A2	7.7e-34	0.44031	0.962	0.682	8.56e-31
OPHN1	0.00379232	0.427807	0.968	0.794	1
IGFBP7	2.18e-06	0.425474	0.752	0.511	0.00241954
PSD2	8.23e-06	0.42542	0.803	0.693	0.00915523
RYR3	0.574768	0.4239	0.993	0.946	1
FRMD4A	2.45e-09	0.422637	0.79	0.566	2.73e-06
GPC5	5.73e-14	0.421549	1	0.991	6.37e-11
GPM6A	3.36e-22	0.417996	1	0.995	3.74e-19
ITPKB	0.125535	0.417498	0.939	0.722	1
PDE4B	0.0386376	0.417307	0.997	0.816	1
ARHGAP24	2.49e-05	0.412311	0.999	0.824	0.0276644
PTPRZ1	0.0679172	0.412289	0.996	0.855	1
HIF3A	0.835241	0.411517	0.934	0.799	1
LINC00499	0.00596482	0.407106	1	0.86	1
EFEMP1	4.88e-12	0.399187	0.996	0.739	5.43e-09
SOX5	2.69e-14	0.396253	1	0.965	2.99e-11
AC087564.1	0.000280491	0.391928	0.745	0.561	0.311906
ATP13A4	0.000592095	0.391131	0.898	0.74	0.658409
COL5A3	3.26e-06	0.389944	0.958	0.837	0.0036245
CHST11	8.65e-13	0.388476	0.819	0.538	9.62e-10
PCSK5	1.67e-19	0.387889	0.991	0.594	1.85e-16
ITGA7	1.46e-05	0.385508	0.933	0.762	0.0162583
NAALADL2	1.96e-07	0.384466	0.961	0.69	0.000218125
NPAS3	2.36e-19	0.381879	1	0.994	2.62e-16
CST3	0.000282882	0.37923	1	0.875	0.314564
ERBIN	0.00350451	0.37923	1	0.879	1
ABLIM1	0.129073	0.377421	0.959	0.849	1
TRPS1	0.123356	0.377239	1	0.918	1
AHCYL2	0.0144102	0.372651	0.983	0.846	1
PARD3B	0.00450534	0.371474	0.968	0.844	1
PRRX1	1.41e-79	0.371249	0.994	0.684	1.57e-76
DTNA	1.2e-16	0.368366	0.988	0.985	1.33e-13
CDH20	0.00277122	0.368254	1	0.957	1
ALDH1L1	7.78e-11	0.367935	0.853	0.58	8.65e-08
STK33	3.4e-13	0.362986	0.999	0.73	3.78e-10
MAPK4	0.0614068	0.362277	0.797	0.582	1
MCC	1.52e-08	0.362197	0.818	0.595	1.69e-05
SLC25A48	1.2e-05	0.360869	0.627	0.39	0.0133539
DNAH7	2.47e-09	0.36003	0.994	0.842	2.75e-06
AC110023.1	1.09e-30	0.360028	0.732	0.343	1.22e-27
DPP10	1.72e-05	0.355545	1	0.902	0.0191214
PDGFRB	7.28e-05	0.354331	0.655	0.445	0.0809785
GEM	1.29e-05	0.35319	0.681	0.461	0.0143171
SCD5	0.000544761	0.351624	0.885	0.718	0.605774
MERTK	0.00192589	0.348215	0.843	0.672	1
DLC1	2.18e-08	0.346318	0.999	0.821	2.43e-05
GLIS3	0.000595047	0.34602	0.999	0.894	0.661692
AF279873.3	9.57e-30	0.34404	0.975	0.677	1.06e-26
SPON1	0.0393892	0.34273	0.888	0.689	1
LINC00598	7.43e-19	0.342084	0.738	0.45	8.26e-16
PHLPP1	4.82e-06	0.341785	0.968	0.819	0.00536237
CDC14A	7.21e-28	0.34016	0.981	0.549	8.02e-25
MSI2	0.00441409	0.340154	0.968	0.895	1
CSGALNACT1	0.00416801	0.337673	0.885	0.785	1
LDLRAD3	1.09e-27	0.334902	0.771	0.389	1.21e-24
SNED1	0.0326027	0.33357	0.631	0.422	1
PDLIM5	1.31e-11	0.333057	0.99	0.66	1.46e-08
GJA1	0.0261216	0.328197	0.999	0.88	1
ATP1A2	0.0249264	0.327577	0.923	0.78	1
SLC1A3	3.08e-09	0.327031	0.99	0.961	3.42e-06
AC098829.1	0.124097	0.322814	0.494	0.284	1
AL160272.2	3.74e-09	0.320801	0.794	0.548	4.16e-06
TMTC2	4.12e-11	0.318336	0.966	0.673	4.58e-08
ADAMTS17	4.37e-08	0.317176	0.825	0.686	4.86e-05
SLC1A2	1.79e-24	0.310188	0.983	0.976	1.99e-21
PTN	0.000149313	0.309682	0.904	0.685	0.166037
RIN2	1.56e-05	0.307845	0.758	0.572	0.0173732
TNS3	0.008522	0.304312	0.684	0.472	1
CHD7	1.03e-56	0.303781	0.913	0.483	1.14e-53
APOE	0.489323	0.302752	1	0.855	1
ZFHX4	2.63e-05	0.302177	0.958	0.749	0.0292747
DAAM2	0.801762	0.30005	0.684	0.645	1
PAPLN	0.000172255	0.29288	0.789	0.621	0.191548
C8orf37-AS1	5.34e-73	0.292656	0.867	0.413	5.93e-70
ADAMTS9	9.87e-09	0.291648	0.305	0.138	1.1e-05
RGMA	7.66e-09	0.29153	0.815	0.526	8.52e-06
STON2	0.000696267	0.290512	0.939	0.727	0.774249
GJB6	1.2e-84	0.285953	0.996	0.545	1.33e-81
TRPM3	0.00166425	0.27885	0.897	0.81	1
ACSBG1	0.00158492	0.277259	0.879	0.711	1
TOX	2.32e-07	0.276285	0.994	0.714	0.000257489
SFMBT2	9.97e-07	0.274709	0.794	0.543	0.00110842
FOXO1	1.12e-10	0.27378	0.984	0.714	1.24e-07
VAV3	4.98e-12	0.27374	0.837	0.514	5.54e-09
ABTB2	1.1e-38	0.273028	0.287	0.177	1.23e-35
SH3RF3	0.0450536	0.270966	0.66	0.506	1
AC108866.1	5.54e-10	0.270896	0.79	0.469	6.16e-07
TCF7L2	0.000995511	0.270686	0.921	0.69	1
EFNA5	0.00096092	0.268372	0.984	0.807	1
BMP2K	0.0038767	0.26787	0.828	0.622	1
RFX4	0.00977423	0.262423	0.939	0.805	1
CC2D2B	4.95e-06	0.261804	0.56	0.29	0.00550111
BICC1	5.61e-49	0.256805	0.985	0.555	6.24e-46
LINC00511	0.0142711	0.256615	0.878	0.635	1
EPHB1	0.000601464	0.255779	0.774	0.609	0.668828
NKAIN3	0.00718716	0.254616	0.966	0.89	1
NCKAP5	1.32e-05	0.253346	0.999	0.89	0.0147114
GRM3	0.00216888	0.252497	0.851	0.672	1
LRRC4C	9.54e-10	0.25123	0.94	0.733	1.06e-06
PPP1R3C	6.06e-24	-0.257809	0.669	0.266	6.74e-21
TF	6.88e-39	-0.261374	0.761	0.416	7.65e-36
PCDH15	3.67e-65	-0.263692	0.813	0.361	4.08e-62
DOCK10	4.31e-07	-0.264914	0.633	0.391	0.000479688
GREB1L	1.59e-10	-0.265138	0.558	0.231	1.77e-07
MITF	2.01e-29	-0.271707	0.92	0.606	2.23e-26
MDGA2	2.19e-05	-0.272482	0.481	0.347	0.0243693
CNP	1.92e-113	-0.274944	0.937	0.393	2.14e-110
TNR	5.56e-57	-0.276053	0.353	0.409	6.18e-54
KCNH7	3.37e-91	-0.277681	0.93	0.393	3.75e-88
SLC44A1	4.53e-28	-0.27917	0.923	0.561	5.03e-25
PDE1A	0.294524	-0.280947	0.571	0.361	1
KCNH8	0.00200801	-0.282916	0.551	0.35	1
CLDND1	2.74e-132	-0.287087	0.999	0.543	3.05e-129
SPP1	3.34e-20	-0.293381	0.847	0.502	3.71e-17
DCC	4.34e-66	-0.293513	0.757	0.25	4.83e-63
IFITM3	2.31e-74	-0.298395	0.943	0.381	2.57e-71
SPOCK3	0.338338	-0.299708	0.595	0.42	1
LAMA2	3.43e-09	-0.302656	0.561	0.253	3.81e-06
GRIP1	2.9e-32	-0.303423	0.679	0.277	3.22e-29
KAZN	1.79e-22	-0.303525	0.445	0.427	1.99e-19
PRKG1	2.96e-10	-0.30524	0.872	0.799	3.29e-07
GRIK1	5.48e-09	-0.305739	0.571	0.215	6.1e-06
TMEM144	8.05e-50	-0.306057	1	0.664	8.95e-47
DSCAM	2.19e-83	-0.308177	0.869	0.359	2.43e-80
SH3GL3	2.49e-53	-0.321871	0.308	0.325	2.77e-50
TFRC	1.89e-09	-0.324694	0.612	0.3	2.1e-06
BGN	1.38e-152	-0.326665	0.959	0.28	1.54e-149
LINGO2	0.052411	-0.334933	0.461	0.247	1
ADAMTS9-AS2	3.43e-07	-0.342549	0.517	0.399	0.000380886
CERCAM	2.36e-62	-0.3454	0.815	0.381	2.62e-59
ROBO2	0.953491	-0.357102	0.48	0.295	1
CREB5	2.55e-19	-0.35836	0.732	0.393	2.83e-16
LRFN5	8.67e-25	-0.366868	0.659	0.312	9.65e-22
TMEFF2	0.0293824	-0.367867	0.56	0.365	1
PCLO	4.28e-14	-0.374426	0.822	0.512	4.76e-11
JUNB	9.71e-09	-0.381756	0.494	0.217	1.08e-05
AQP1	3.39e-132	-0.387802	0.983	0.384	3.77e-129
AEBP1	0.0463025	-0.388555	0.997	0.719	1
FRMD4B	0.00366097	-0.392311	0.571	0.322	1
KIRREL3	1.68e-15	-0.396774	0.366	0.215	1.87e-12
SGK1	0.00015631	-0.398871	0.442	0.31	0.173816
SHTN1	0.475875	-0.443364	0.605	0.448	1
IQCJ-SCHIP1	0.00957984	-0.447045	1	0.739	1
PLCL1	0.0266592	-0.456111	0.749	0.594	1
SNTG1	0.000239885	-0.46336	0.44	0.306	0.266752
CTNNA3	3.86e-11	-0.515096	0.598	0.271	4.29e-08
KCNIP4	1.61e-12	-0.520792	0.768	0.476	1.79e-09
PDE1C	2.04e-103	-0.531585	0.211	0.307	2.26e-100
EDIL3	4.07e-22	-0.554925	0.719	0.379	4.53e-19
CRYAB	1.17e-27	-0.558201	0.993	0.722	1.3e-24
SLC24A2	0.000101734	-0.582665	0.589	0.318	0.113128
NRGN	0.126662	-0.595789	0.883	0.727	1
ST18	5.61e-76	-0.607058	0.383	0.494	6.24e-73
RBFOX1	0.0276945	-0.693368	0.726	0.651	1
CNTNAP2	3.49e-09	-0.76916	0.471	0.391	3.88e-06
PLP1	3.06e-06	-0.85373	0.844	0.571	0.0034081

## Sheet: Supplementary Table 6
Supplementary Table 6 :The differentially expressed genes for Astros from stage2 versus stage3
	p_val	avg_log2FC	pct.1	pct.2	p_val_adj
DPP10	6.8e-18	0.539552	0.902	0.946	7.56e-15
NRGN	7.17e-18	0.474071	0.727	0.968	7.97e-15
PLP1	4.13e-18	0.350361	0.571	0.824	4.59e-15
PRKG1	1.28e-07	0.256539	0.799	0.849	0.000141927
GPC5	4.76e-31	0.253101	0.991	0.979	5.3e-28
ATP10B	1.56e-48	0.252418	0.333	0.396	1.74e-45
LAMA2	7.14e-111	-0.250851	0.253	0.65	7.94e-108
AKAP13	3.26e-20	-0.251962	0.6	0.822	3.62e-17
PTN	0.00233243	-0.253687	0.685	0.947	1
LHFPL6	0.000176259	-0.254202	0.72	0.869	0.196
CGNL1	2.19e-88	-0.255843	0.54	0.873	2.44e-85
GFAP	0.887898	-0.259638	0.905	0.919	1
DLGAP2	5.02e-234	-0.263125	0.221	0.725	5.59e-231
PDZRN4	3.84e-20	-0.263318	0.466	0.533	4.26e-17
TENM4	2.44e-12	-0.265008	0.501	0.75	2.72e-09
GPR37L1	2.11e-09	-0.265102	0.66	0.918	2.34e-06
AQP4	0.553943	-0.265414	0.863	0.994	1
COLEC12	5.61e-42	-0.267554	0.469	0.812	6.24e-39
FAM107A	1.7e-07	-0.269128	0.737	0.907	0.0001894
NFATC2	3.71e-267	-0.26969	0.566	0.894	4.13e-264
LGI1	0.00403207	-0.271173	0.77	0.944	1
RIN2	3.26e-20	-0.272488	0.572	0.822	3.63e-17
CHST11	0.434318	-0.274912	0.538	0.659	1
UTRN	1.09e-41	-0.27552	0.529	0.871	1.21e-38
BMP2K	7.56e-11	-0.276034	0.622	0.894	8.4e-08
ADGRA3	2.29e-18	-0.276056	0.705	0.955	2.55e-15
KCNMB2-AS1	3.35e-08	-0.27625	0.595	0.777	3.73e-05
CDC14A	5.32e-38	-0.278894	0.549	0.909	5.92e-35
EFEMP1	3.7e-13	-0.279195	0.739	0.996	4.11e-10
LCNL1	0.103998	-0.279954	0.39	0.565	1
UST	3.86e-21	-0.280987	0.348	0.641	4.3e-18
PLCH1	1.6e-101	-0.28192	0.426	0.79	1.78e-98
PCSK5	0.000555918	-0.285852	0.594	0.806	0.618181
PLEKHG1	1.23e-28	-0.290013	0.403	0.737	1.37e-25
TOX	7.73e-09	-0.290312	0.714	0.936	8.6e-06
SOX6	0.501828	-0.291485	0.806	0.948	1
F11-AS1	2.24e-44	-0.291592	0.499	0.81	2.5e-41
RGS20	0.00268097	-0.293291	0.594	0.765	1
VAV3	3.02e-47	-0.293671	0.514	0.895	3.36e-44
GLUL	0.000474078	-0.293986	0.865	0.937	0.527175
PDE7B	0.0800052	-0.295994	0.794	0.96	1
GLIS3	7.91e-06	-0.296938	0.894	0.96	0.00879157
ITGB4	2.34e-10	-0.299965	0.673	0.94	2.6e-07
TANC1	4.85e-60	-0.303477	0.441	0.755	5.39e-57
LINC00982	8.32e-69	-0.305605	0.45	0.812	9.25e-66
DAAM2	1.61e-94	-0.307975	0.645	0.958	1.79e-91
PDE4B	2.14e-05	-0.312345	0.816	0.959	0.0238185
ZNRF3	0.000887056	-0.313748	0.845	0.961	0.986406
GRIP1	4.67e-190	-0.313819	0.277	0.778	5.2e-187
LDLRAD3	1.12e-58	-0.315655	0.389	0.759	1.24e-55
RBPMS	1.94e-86	-0.317372	0.566	0.873	2.15e-83
COL5A3	9.72e-05	-0.317715	0.837	0.951	0.108064
ITPR2	0.013573	-0.318539	0.823	0.928	1
ATP1B2	0.250689	-0.321244	0.801	0.988	1
PTPRZ1	0.473139	-0.323971	0.855	0.978	1
SLC7A2	1.53e-06	-0.328834	0.305	0.539	0.0016959
FGF2	6.87e-13	-0.335076	0.601	0.841	7.64e-10
FAM189A2	1.4e-13	-0.350858	0.721	0.93	1.56e-10
SFMBT2	1.82e-17	-0.350876	0.543	0.815	2.02e-14
CD44	3.71e-08	-0.354684	0.177	0.459	4.12e-05
TMTC2	4.02e-05	-0.354975	0.673	0.772	0.0446591
DSCAM	3.02e-63	-0.355216	0.359	0.689	3.36e-60
ITPKB	1.37e-06	-0.355536	0.722	0.806	0.00152881
AGBL4	3.73e-16	-0.355789	0.636	0.915	4.14e-13
RGMA	6.2e-44	-0.357993	0.526	0.874	6.89e-41
ALDH1L1	0.138369	-0.358159	0.58	0.703	1
RFX4	0.000373842	-0.36024	0.805	0.935	0.415712
THSD7A	3.5e-39	-0.365987	0.544	0.878	3.89e-36
SLC4A4	1.53e-09	-0.368481	0.864	0.969	1.7e-06
KLF6	2.77e-138	-0.370903	0.368	0.756	3.08e-135
AEBP1	2.77e-05	-0.371724	0.719	0.909	0.0308058
AHCYL2	0.0214211	-0.372017	0.846	0.964	1
PTCHD1-AS	1.07e-10	-0.372742	0.735	0.935	1.19e-07
LRIG1	3.6e-07	-0.375781	0.828	0.982	0.0004003
TCF7L2	9.12e-10	-0.380272	0.69	0.881	1.01e-06
AC027117.2	4.81e-40	-0.381414	0.56	0.862	5.35e-37
MAML2	3.52e-08	-0.382523	0.899	0.981	3.91e-05
PDLIM5	4.13e-16	-0.383896	0.66	0.917	4.59e-13
IGFBP7	2.43e-43	-0.38491	0.511	0.868	2.7e-40
HPSE2	3.12e-05	-0.396768	0.902	0.983	0.0347276
EYA2	3.48e-40	-0.397417	0.633	0.944	3.87e-37
CACHD1	8.27e-06	-0.398303	0.636	0.807	0.00919312
RBFOX1	1.2e-55	-0.398337	0.651	0.887	1.33e-52
SLC14A1	6.52e-15	-0.401612	0.79	0.955	7.25e-12
TPD52L1	2.78e-13	-0.402874	0.747	0.848	3.09e-10
SHROOM3	2.31e-08	-0.40512	0.708	0.949	2.57e-05
MERTK	1.32e-21	-0.406256	0.672	0.931	1.46e-18
ERBIN	3.71e-11	-0.407825	0.879	0.978	4.12e-08
GRM3	3.42e-13	-0.409908	0.672	0.958	3.8e-10
MRVI1	1.62e-44	-0.415241	0.454	0.795	1.8e-41
STON2	1.78e-08	-0.415598	0.727	0.954	1.97e-05
LINC00299	3.08e-18	-0.418587	0.767	0.979	3.42e-15
EYA1	3.37e-36	-0.41994	0.686	0.928	3.75e-33
SLC25A18	6.71e-08	-0.42066	0.717	0.884	7.46e-05
PAMR1	2.19e-31	-0.427068	0.591	0.93	2.43e-28
EFNA5	1.52e-12	-0.437663	0.807	0.985	1.69e-09
SLC7A11	1.25e-12	-0.439028	0.722	0.921	1.39e-09
RANBP3L	1.14e-12	-0.441299	0.738	0.943	1.26e-09
PTPRM	7.26e-30	-0.447085	0.612	0.901	8.08e-27
PREX2	1.78e-13	-0.455958	0.822	0.978	1.98e-10
RNF219-AS1	9.56e-19	-0.48232	0.837	0.94	1.06e-15
ATP13A4	5.62e-06	-0.489885	0.74	0.971	0.00624892
ACSS1	1.07e-08	-0.521072	0.812	0.961	1.19e-05
CACNA2D3	4.47e-13	-0.524872	0.505	0.527	4.97e-10
ZNF98	1.52e-23	-0.540977	0.756	0.949	1.69e-20
EGFR	5.27e-45	-0.544274	0.661	0.941	5.86e-42
CRB1	1.46e-12	-0.558915	0.812	0.987	1.62e-09
ABLIM1	1.14e-15	-0.559416	0.849	0.983	1.27e-12
FGD4	1.92e-16	-0.572835	0.744	0.921	2.13e-13

## Sheet: Supplementary Table 7
Supplementary Table 7 :The differentially expressed genes for Endo from stage1 versus stage2
	p_val	avg_log2FC	pct.1	pct.2	p_val_adj
SLC4A4	0.000112844	1.79891	0.484	0.735	0.125482
CRISPLD2	0.0703008	1.6219	0.316	0.184	1
TRPM3	0.0404504	1.53732	0.823	0.789	1
PCAT1	0.24938	1.53243	0.893	0.812	1
ANKRD30BL	1.11e-09	1.4883	0.665	0.377	1.23e-06
SORBS2	0.0856318	1.44527	0.698	0.677	1
THSD4	0.0200979	1.36905	0.595	0.731	1
MYRIP	0.157653	1.34831	0.581	0.659	1
ENC1	1.04e-05	1.29019	0.488	0.771	0.0115767
KAZN	0.682854	1.27772	0.516	0.498	1
EYA1	0.00105392	1.27057	0.814	0.816	1
SLIT3	0.204466	1.20011	0.391	0.291	1
COL4A1	0.278714	1.11567	0.586	0.413	1
ABI3BP	4.67e-10	1.09108	0.307	0.596	5.19e-07
SH3RF3	0.912785	1.0394	0.479	0.363	1
NRG1	5.16e-05	1.01377	0.521	0.448	0.0574181
PELI1	0.197833	0.996173	0.553	0.413	1
COL4A2	0.159147	0.977012	0.451	0.323	1
JUNB	0.217709	0.969674	0.526	0.395	1
ID4	0.160933	0.962391	0.488	0.753	1
BNC2	0.00245995	0.948964	0.391	0.448	1
DPP10	0.192128	0.932249	0.679	0.717	1
UNC13C	0.231841	0.910511	0.484	0.386	1
ABLIM1	0.0502017	0.871265	0.66	0.516	1
PDLIM5	0.150018	0.868507	0.651	0.507	1
TEX41	0.0627259	0.867787	0.47	0.408	1
MAPK4	6.46e-05	0.867141	0.493	0.574	0.0717825
FLT1	0.175026	0.848585	0.893	0.753	1
ATP10A	0.525777	0.848261	0.623	0.691	1
C8orf34	1.5e-06	0.840991	0.633	0.184	0.00166602
FAM129A	0.0117533	0.831865	0.493	0.565	1
COL25A1	0.831788	0.823764	0.484	0.314	1
ABCB1	0.0654926	0.812448	0.67	0.794	1
PGM5	0.0123524	0.812207	0.591	0.336	1
VEGFC	0.00103375	0.81215	0.865	0.695	1
NHS	0.0578874	0.797213	0.335	0.3	1
SLC2A3	0.609124	0.795943	0.521	0.493	1
NR4A3	0.000392779	0.792339	0.372	0.574	0.43677
SYNDIG1	3.35e-29	0.790554	0.944	0.619	3.73e-26
ENTPD1	0.285841	0.790067	0.512	0.601	1
L3MBTL4	0.879304	0.784947	0.512	0.372	1
MYL9	0.326961	0.779389	0.609	0.668	1
HECW1	2.25e-07	0.771021	0.712	0.556	0.000249813
ST8SIA6	0.0642512	0.770405	0.698	0.605	1
KCNAB1	3.46e-05	0.769671	0.53	0.812	0.0384775
EYA2	3.75e-08	0.769262	0.702	0.798	4.17e-05
EPAS1	0.69847	0.764353	0.749	0.641	1
PDZRN4	9.9e-12	0.76322	0.712	0.215	1.1e-08
LINGO2	0.00353296	0.755914	0.558	0.372	1
ST6GALNAC3	0.434024	0.755346	0.856	0.857	1
TMTC2	0.00139729	0.746317	0.981	0.744	1
ADAMTS1	0.00084354	0.743953	0.591	0.377	0.938016
CLMN	0.0159277	0.742648	0.865	0.686	1
PLPP3	0.533173	0.742319	0.712	0.596	1
SLC8A1	0.499084	0.74198	0.558	0.655	1
KIAA1217	0.059984	0.740252	0.405	0.381	1
PKP2	0.0647839	0.71161	0.795	0.762	1
KCNIP4	0.00690826	0.710457	0.623	0.345	1
SLC7A2	0.636719	0.710122	0.474	0.229	1
AHNAK	0.316675	0.709622	0.907	0.74	1
ADAMTSL3	0.118654	0.708025	0.4	0.48	1
DSP	0.344775	0.695715	0.86	0.677	1
PTPRG	0.942815	0.685603	1	0.861	1
FGD4	0.62673	0.67603	0.893	0.834	1
TBC1D4	0.00309004	0.673276	0.972	0.646	1
NKAIN2	0.985538	0.671332	0.488	0.511	1
SCG2	0.0468963	0.663353	0.642	0.439	1
DIAPH2	2.31e-09	0.658502	0.842	0.628	2.57e-06
DUSP1	0.00862061	0.657822	0.67	0.435	1
ROBO2	1.27e-05	0.648399	0.377	0.471	0.0141381
CTNNA2	2.57e-09	0.640805	0.981	0.641	2.86e-06
IQCJ-SCHIP1	2.03e-08	0.626578	0.712	0.377	2.26e-05
KCNQ3	0.0014931	0.626417	0.772	0.605	1
SCD5	1.27e-11	0.626146	0.674	0.274	1.42e-08
ITGBL1	6.84e-16	0.62376	0.265	0.188	7.61e-13
SDC2	0.630883	0.623758	0.707	0.704	1
CTNNA3	0.00109785	0.607749	0.712	0.726	1
ARHGAP10	0.358917	0.596536	0.702	0.74	1
NEAT1	0.995783	0.5942	0.926	0.906	1
SRGN	0.00113261	0.591227	0.642	0.462	1
ZNF366	8.02e-05	0.58877	0.526	0.13	0.0891628
SNED1	0.0360324	0.587143	0.516	0.574	1
LRMDA	0.244526	0.587105	0.758	0.65	1
TIMP3	0.278559	0.585708	0.819	0.825	1
LINC00607	0.0660579	0.582578	0.465	0.143	1
SNTG2	0.0896003	0.581725	0.581	0.175	1
PCDH11Y	0.254382	0.580598	0.856	0.785	1
CALD1	0.766081	0.579553	0.926	0.87	1
IGF2BP2	0.299889	0.579535	0.33	0.242	1
ADAMTS6	5.23e-05	0.579124	0.586	0.709	0.0582116
TMEM163	8.65e-06	0.576053	0.628	0.404	0.00962093
RIN2	0.0321351	0.562707	0.67	0.507	1
DGKG	1.6e-15	0.562221	0.795	0.363	1.78e-12
NEFM	7.44e-08	0.558294	0.433	0.726	8.28e-05
AL589740.1	7.97e-13	0.556705	0.884	0.717	8.86e-10
ZFHX3	0.00772264	0.551062	0.898	0.883	1
GRIK1	0.00686873	0.544533	0.833	0.655	1
ATP1B3	0.746519	0.535967	0.749	0.632	1
STXBP5L	2.42e-08	0.534378	0.977	0.834	2.69e-05
NDRG1	0.0233722	0.529889	0.828	0.7	1
FREM1	3.68e-05	0.529298	0.819	0.812	0.040934
LDB2	0.196064	0.525083	0.642	0.619	1
CNTNAP2	0.676209	0.521306	0.521	0.399	1
SFMBT2	0.000461242	0.520572	0.693	0.489	0.512901
TNIK	0.00656631	0.514562	0.949	0.543	1
VIM	0.304786	0.512673	0.842	0.888	1
PTPRT	0.592271	0.51228	0.433	0.215	1
ADAMTS17	1.87e-12	0.509538	0.312	0.448	2.08e-09
STOM	0.998795	0.506749	0.86	0.731	1
EPSTI1	9.67e-05	0.503275	0.665	0.565	0.107521
PDE8A	0.0755973	0.498723	0.893	0.731	1
PRKCH	0.824294	0.490149	0.744	0.7	1
FAM20A	0.00133016	0.487908	0.516	0.435	1
TSHZ2	0.00387387	0.483484	0.586	0.422	1
DOCK11	0.207908	0.482491	0.665	0.623	1
AC019197.1	0.00138221	0.479449	0.526	0.578	1
LTBP1	0.595993	0.477282	0.637	0.453	1
CDH9	0.486858	0.476149	0.465	0.148	1
ST6GAL1	0.0378857	0.475727	0.609	0.677	1
ELOVL7	0.772974	0.470035	0.795	0.776	1
PDE3A	1.21e-10	0.470031	0.86	0.426	1.35e-07
MBP	2.76e-09	0.469862	0.381	0.489	3.07e-06
ALDH1A2	1.62e-09	0.468504	0.665	0.224	1.81e-06
TFRC	0.000140553	0.461068	0.786	0.592	0.156295
NRGN	0.0228947	0.45723	0.967	0.874	1
IGFBP5	0.00753318	0.453274	0.767	0.547	1
CDH13	0.983729	0.453126	0.433	0.278	1
PLXDC2	0.263373	0.45303	0.674	0.713	1
FYB1	0.0031195	0.452919	0.763	0.812	1
TGM2	0.003666	0.44983	0.758	0.646	1
ANKRD37	0.0424809	0.440775	0.647	0.444	1
TMEM132C	0.399781	0.440329	0.767	0.767	1
NOS1	0.0426138	0.438061	0.428	0.39	1
AJ009632.2	4.3e-09	0.436731	0.87	0.821	4.78e-06
AC007319.1	0.00448245	0.433802	0.479	0.247	1
RGS16	0.111467	0.433491	0.302	0.341	1
BMP6	0.796734	0.429756	0.437	0.368	1
LGR4	0.748724	0.42869	0.716	0.673	1
SEMA3C	0.000274869	0.428233	0.405	0.309	0.305654
EYS	0.000195889	0.427468	0.488	0.211	0.217829
ARHGEF28	0.000590115	0.427409	0.572	0.659	0.656208
DPYD	0.00122247	0.427328	0.879	0.628	1
PTPRC	1.65e-11	0.424621	0.679	0.233	1.83e-08
LRFN5	0.0318368	0.421511	0.753	0.673	1
PCSK2	0.000683812	0.418369	0.507	0.291	0.760398
GPCPD1	0.116241	0.418212	0.763	0.525	1
AHCYL2	0.838431	0.414852	0.726	0.821	1
RAP2C-AS1	0.665071	0.411661	0.651	0.709	1
FOS	0.0925432	0.41153	0.512	0.39	1
ADGRG6	3.35e-17	0.408635	0.353	0.574	3.73e-14
TBXAS1	0.0144167	0.405161	0.33	0.422	1
LUZP2	1.4e-07	0.397374	0.609	0.206	0.000155496
NPNT	5.43e-12	0.392939	0.67	0.063	6.03e-09
SLC35F3	0.00255379	0.390213	0.358	0.139	1
RBFOX1	1.85e-12	0.387003	0.893	0.444	2.05e-09
AC108866.1	3.49e-08	0.384962	0.502	0.229	3.88e-05
PDK4	0.00551305	0.38403	0.8	0.534	1
IFI44L	0.477238	0.380016	0.367	0.184	1
NTN1	0.0670119	0.373784	0.549	0.717	1
ARHGAP24	3.62e-14	0.37223	0.753	0.48	4.02e-11
SKAP1	0.0143826	0.368236	0.526	0.022	1
ADGRA3	0.0605237	0.367047	0.516	0.695	1
IRAK3	0.398434	0.366783	0.53	0.368	1
PDE1A	1.81e-08	0.361656	0.86	0.489	2.02e-05
ZNF385D	6.8e-05	0.359339	0.688	0.48	0.0755928
PODXL	0.00528603	0.35896	0.93	0.798	1
TEK	0.090376	0.358413	0.888	0.812	1
HIP1	0.342857	0.357804	0.591	0.341	1
GRIA3	2.34e-07	0.357568	0.507	0.108	0.000260124
SMOC1	0.00141966	0.355953	0.428	0.148	1
LINC02112	0.347215	0.353029	0.358	0.283	1
AC092378.1	3.88e-13	0.352221	0.307	0.471	4.32e-10
PLCB4	0.0995863	0.35183	0.758	0.821	1
PTPRM	0.441174	0.348531	0.944	0.789	1
LINC01266	2.49e-05	0.345189	0.414	0.175	0.0276809
WWTR1	0.00931794	0.344181	0.493	0.529	1
AC034195.1	0.601538	0.343201	0.409	0.229	1
LINC01088	0.652081	0.342669	0.944	0.852	1
SPON1	6.31e-07	0.342123	0.753	0.574	0.000701779
LHFPL3	0.00709888	0.341	0.6	0.332	1
ABCG2	0.0066892	0.335244	0.591	0.695	1
SYNPO2	0.539214	0.335003	0.423	0.224	1
CABLES1	0.419429	0.331895	0.507	0.377	1
TYROBP	3.57e-26	0.331379	0.795	0.628	3.96e-23
GPC6	0.00015188	0.330299	0.674	0.789	0.16889
PPARGC1A	0.00239315	0.328287	0.656	0.614	1
AC113383.1	0.000751596	0.324157	0.888	0.489	0.835775
KCNH5	0.0138427	0.322399	0.47	0.341	1
AL117329.1	0.486994	0.316071	0.516	0.202	1
IL1RAPL2	0.0231031	0.315757	0.902	0.686	1
PLD1	1.68e-06	0.31537	0.637	0.825	0.00186984
SVIL	0.060674	0.313362	0.684	0.516	1
PDGFD	1.17e-05	0.311399	0.386	0.475	0.0130654
FAR2	0.0077218	0.310945	0.479	0.318	1
NPAS3	0.00410633	0.310928	0.874	0.704	1
SLC7A1	0.764881	0.31047	0.581	0.659	1
CHSY3	1.46e-08	0.308551	0.884	0.61	1.62e-05
GNA14	3.55e-05	0.304869	0.6	0.489	0.0395213
MYO1E	0.0321351	0.304587	0.391	0.408	1
SLC22A3	5.62e-07	0.304524	0.8	0.43	0.000625405
HCN1	0.0221968	0.303845	0.656	0.7	1
AC073332.1	1.79e-08	0.302101	0.698	0.3	1.99e-05
SGK1	1.06e-07	0.301776	0.726	0.426	0.00011792
GALNTL6	0.601188	0.301183	0.535	0.368	1
SHROOM4	0.285888	0.296485	0.679	0.735	1
LINC02306	0.440612	0.296437	0.474	0.175	1
MRC1	0.0606212	0.288965	0.447	0.072	1
PRELID2	0.0745702	0.288696	0.66	0.587	1
LINC00924	7.71e-08	0.287506	0.465	0.565	8.57e-05
MYO16	6.01e-11	0.287195	0.507	0.807	6.68e-08
BMPER	0.201274	0.286122	0.726	0.614	1
RNF152	0.00184756	0.285211	0.526	0.695	1
MAP3K8	0.882903	0.284643	0.321	0.081	1
FAM107B	0.00224984	0.282431	0.609	0.762	1
KIRREL3	1.61e-06	0.280586	0.563	0.22	0.0017909
RERG	0.00415488	0.276845	0.553	0.323	1
GPM6A	0.00213722	0.270844	0.637	0.444	1
TANC1	0.433993	0.268767	0.721	0.646	1
SNTG1	2.9e-10	0.267687	0.721	0.435	3.23e-07
PLEKHG1	0.0553577	0.266831	0.716	0.525	1
ENOX2	2.16e-17	0.266182	0.786	0.345	2.4e-14
CADPS2	0.764908	0.261532	0.772	0.614	1
STOX1	0.00240448	0.258444	0.493	0.686	1
PLCL1	0.540261	0.258316	0.763	0.709	1
RYR3	0.061252	0.256242	0.521	0.439	1
LRRC3B	1.75e-23	0.25583	0.898	0.507	1.94e-20
LAMA3	0.130872	0.255408	0.498	0.587	1
AC073529.1	5.07e-22	0.254433	0.2	0.534	5.64e-19
CDK18	0.000687595	0.252713	0.6	0.269	0.764606
CC2D2B	0.519858	0.252438	0.433	0.135	1
ITGA11	6.4e-07	0.251808	0.567	0.17	0.000711764
TMEM144	9.19e-09	0.251524	0.707	0.713	1.02e-05
HIF3A	0.0600143	0.250207	0.405	0.413	1
APOLD1	0.370832	-0.251608	0.526	0.462	1
AC244021.1	5.77e-06	-0.251734	0.819	0.502	0.00641952
SLC2A1	0.968674	-0.251886	0.614	0.453	1
CD9	0.000254254	-0.25198	1	0.794	0.28273
KCNIP1	0.00142089	-0.25205	0.744	0.673	1
TMEM98	0.0121059	-0.253494	0.837	0.52	1
FN1	0.0926347	-0.254193	0.749	0.794	1
NOTCH3	0.161301	-0.255688	0.912	0.812	1
COL6A2	0.731698	-0.256345	0.833	0.726	1
EPS8	0.0134869	-0.257907	0.823	0.839	1
PAMR1	0.246708	-0.259187	0.786	0.713	1
SLC38A11	0.409177	-0.263343	0.823	0.812	1
IFITM3	0.00257539	-0.265112	0.991	0.798	1
MT2A	0.0828357	-0.267248	0.926	0.87	1
ARHGAP29	0.136679	-0.267342	0.856	0.704	1
HPSE2	3.35e-11	-0.268029	0.921	0.65	3.73e-08
SUCLG2-AS1	0.648798	-0.269138	0.814	0.722	1
RHOJ	0.881133	-0.26978	0.767	0.583	1
LINC01515	1.38e-11	-0.271063	0.316	0.587	1.53e-08
SHROOM3	8.91e-10	-0.27116	0.935	0.731	9.91e-07
SAT1	0.579884	-0.271701	0.819	0.744	1
A2M	0.0805831	-0.276861	0.814	0.767	1
AC109927.1	1.68e-17	-0.277268	0.819	0.794	1.87e-14
DDIT4	1.72e-05	-0.280265	0.851	0.601	0.019156
GLUL	0.00338701	-0.281814	0.884	0.785	1
CFH	0.87043	-0.286825	0.879	0.686	1
CPNE4	0.190604	-0.289032	0.47	0.135	1
MARCKSL1	3.91e-07	-0.289225	0.851	0.623	0.000434978
PTH1R	0.0217867	-0.292405	0.879	0.466	1
RNF220	0.944009	-0.294637	0.707	0.61	1
CPM	0.0427316	-0.295976	0.647	0.422	1
FBXL7	0.106262	-0.296561	0.698	0.655	1
SERPINB9	0.00054149	-0.297024	0.74	0.48	0.602137
ICAM1	0.320023	-0.297277	0.586	0.726	1
KCNT2	0.00217691	-0.297368	0.902	0.861	1
CDH6	0.0960622	-0.30531	0.977	0.834	1
TP63	0.445372	-0.309186	0.433	0.457	1
CCDC3	0.523392	-0.310798	0.726	0.641	1
AQP4	0.0060871	-0.315604	0.986	0.848	1
CENPP	3.12e-07	-0.315819	0.833	0.404	0.000347163
SELENOP	0.00572304	-0.31847	0.986	0.839	1
MCTP2	3.35e-05	-0.318553	0.795	0.377	0.0372457
PARD3	0.0637794	-0.321297	0.791	0.668	1
RAD51B	3.52e-07	-0.325954	0.474	0.664	0.000391733
UTRN	0.00593182	-0.328187	0.586	0.744	1
GJC1	0.0494235	-0.328511	0.902	0.803	1
SLC44A1	0.0146485	-0.338245	0.693	0.516	1
TXNIP	0.339469	-0.345718	0.716	0.475	1
DAAM2	0.235787	-0.346182	0.856	0.776	1
LAMA4	0.00270436	-0.348295	0.391	0.587	1
CLDN5	0.559911	-0.348681	0.828	0.848	1
ITGA10	0.288302	-0.348723	0.767	0.713	1
PAPSS2	0.950621	-0.349762	0.898	0.682	1
PBX3	2.95e-10	-0.351018	0.586	0.256	3.29e-07
CDKN1A	0.00128569	-0.351066	0.6	0.381	1
HIF1A	5.43e-07	-0.352658	0.805	0.372	0.000603633
CERCAM	7.59e-05	-0.353084	0.828	0.83	0.0843977
TNFRSF1B	0.450555	-0.360637	0.753	0.641	1
B2M	0.00570358	-0.360772	0.967	0.901	1
CNTN6	0.273496	-0.363609	0.656	0.516	1
ITGA1	0.774727	-0.364115	0.865	0.673	1
NDUFA4L2	0.255105	-0.365563	0.93	0.762	1
BGN	0.250094	-0.384981	0.837	0.65	1
RBMS3	0.0201589	-0.386411	0.967	0.888	1
PCBP3	1.91e-07	-0.386491	0.8	0.336	0.000212822
GPR85	0.00268789	-0.389005	0.902	0.812	1
CA2	1.33e-11	-0.389408	0.879	0.57	1.48e-08
PRRX1	9.56e-06	-0.393244	0.907	0.704	0.0106302
TNS3	1.45e-07	-0.401066	0.419	0.704	0.000161058
STAC	0.21911	-0.401584	0.809	0.785	1
GLIS3	0.529294	-0.405187	0.926	0.695	1
EBF1	4.92e-06	-0.405438	0.814	0.897	0.00547074
MYO1B	0.855006	-0.417126	0.707	0.507	1
IQGAP2	0.000390098	-0.418063	0.972	0.547	0.433789
VRK2	0.0429597	-0.421356	0.684	0.471	1
PIP4K2A	0.531769	-0.422599	0.474	0.511	1
ADAMTS9-AS2	0.0191657	-0.423058	0.888	0.735	1
ZEB1	0.0769949	-0.424991	0.926	0.749	1
PDGFRB	0.427843	-0.427938	0.67	0.484	1
NID1	0.326232	-0.432534	0.567	0.489	1
CST3	0.154177	-0.432835	0.926	0.825	1
NHSL1	0.000802938	-0.437606	0.684	0.359	0.892867
SLC6A1	3.66e-10	-0.440445	0.865	0.901	4.06e-07
DSCAM	0.17614	-0.44183	0.553	0.265	1
CLDND1	0.000467037	-0.442128	0.86	0.695	0.519345
GFAP	0.000111826	-0.443199	0.995	0.848	0.124351
BTNL9	0.0395725	-0.444886	0.842	0.78	1
MAN2A1	5.44e-06	-0.451046	0.926	0.552	0.00605103
CYFIP1	0.492377	-0.46199	0.619	0.413	1
SLC12A2	0.391427	-0.464333	0.958	0.758	1
VEGFA	0.227748	-0.466394	0.349	0.368	1
GJA1	0.000204438	-0.466702	0.949	0.565	0.227335
F3	0.650999	-0.47318	0.828	0.812	1
ATP1A2	0.000845442	-0.477048	0.847	0.87	0.940131
USP53	0.0114124	-0.478091	0.619	0.614	1
CACHD1	0.810216	-0.49048	0.8	0.709	1
NAMPT	0.0471039	-0.495721	0.809	0.825	1
COL4A5	0.0201461	-0.501178	0.981	0.74	1
GRM8	0.0316754	-0.505917	0.972	0.731	1
AC104123.1	6.46e-06	-0.507509	0.916	0.574	0.00718357
GGT5	0.423446	-0.510485	0.967	0.767	1
GRM3	0.109407	-0.51568	0.833	0.502	1
IFI16	5.85e-13	-0.516363	0.874	0.35	6.51e-10
ACSS3	0.265274	-0.519363	0.674	0.601	1
RGS5	3.38e-05	-0.519613	0.772	0.861	0.0375853
ZFP36L1	0.0264657	-0.521848	0.777	0.74	1
COBLL1	0.00176741	-0.527368	0.874	0.776	1
2021-03-03	9.27e-12	-0.528129	0.484	0.242	1.03e-08
ADGRD1	0.114133	-0.531263	0.963	0.753	1
LAMA2	0.0183295	-0.535539	0.972	0.861	1
CTSC	0.266167	-0.536779	0.781	0.655	1
PRKG1	0.000153514	-0.537526	0.619	0.592	0.170707
TRPC4	0.00103033	-0.540209	0.907	0.601	1
GRIP1	0.73793	-0.540228	0.563	0.435	1
SNTB1	0.0167096	-0.54201	0.949	0.762	1
ITGA7	0.869236	-0.545062	0.93	0.816	1
CYBA	0.00183433	-0.548374	1	0.776	1
FOXP2	0.0304381	-0.548835	0.735	0.735	1
PDE4B	0.167654	-0.554339	0.819	0.592	1
SLIT2	9.49e-06	-0.55663	0.981	0.749	0.0105514
LINC02147	1.6e-06	-0.559849	0.958	0.789	0.00177399
PDE1C	0.255406	-0.566979	0.833	0.7	1
DCC	3.78e-39	-0.57186	0.958	0.314	4.2e-36
APOE	3.03e-07	-0.572565	0.967	0.717	0.000336391
SMOC2	0.288685	-0.572945	0.944	0.713	1
DNAH11	0.480124	-0.584339	0.563	0.516	1
ATP1B2	0.0047057	-0.585534	0.995	0.785	1
SHISA6	2.88e-09	-0.590689	0.879	0.65	3.2e-06
ANGPTL4	2.45e-09	-0.593944	0.986	0.857	2.73e-06
TGFBR2	0.00130988	-0.601133	0.851	0.78	1
SLC1A3	0.717024	-0.609359	0.986	0.843	1
LDLRAD3	0.00457656	-0.615444	0.898	0.807	1
DOCK5	0.0206354	-0.6187	0.949	0.583	1
ETS1	0.0694589	-0.620354	0.73	0.61	1
GPER1	0.00301166	-0.621813	0.54	0.309	1
ADAM33	0.00152959	-0.626751	0.786	0.619	1
ABCA6	0.0563207	-0.638838	0.763	0.785	1
COL4A4	0.186778	-0.652137	0.721	0.57	1
ADARB2	0.0995584	-0.666766	0.851	0.516	1
KCNE4	0.00658727	-0.670792	0.767	0.498	1
FBLN1	0.412956	-0.67583	0.735	0.74	1
TFPI	0.365642	-0.678884	0.837	0.749	1
ARHGAP42	0.0440237	-0.682435	0.828	0.816	1
SLC30A10	0.929592	-0.690553	0.795	0.744	1
FAM126A	1.26e-10	-0.692765	0.716	0.287	1.4e-07
MSC-AS1	0.248853	-0.697069	0.781	0.529	1
PID1	0.0034732	-0.706919	0.758	0.422	1
HES4	0.0196338	-0.711013	0.851	0.825	1
NR2F2-AS1	0.000238509	-0.712417	0.623	0.587	0.265222
P2RY14	0.0497712	-0.746798	0.73	0.592	1
ZIC1	0.000276179	-0.766707	0.926	0.834	0.307111
DACH1	0.121992	-0.78472	0.842	0.798	1
ABCA8	0.0170175	-0.798291	0.851	0.812	1
DCN	0.311262	-0.799789	0.986	0.897	1
RERGL	0.000123342	-0.827447	0.767	0.78	0.137156
AC012409.2	0.542067	-0.829397	0.535	0.309	1
SLC6A13	0.54778	-0.8466	0.893	0.709	1
TGFBR3	0.00510637	-0.869555	0.628	0.641	1
PRELP	0.908622	-0.891182	0.893	0.843	1
CEMIP	0.231005	-0.93387	0.893	0.852	1
TRPC3	1.55e-06	-0.945805	0.758	0.843	0.00172126
ABCA9	0.0216023	-0.968163	0.842	0.713	1
ITIH5	9.44e-05	-1.0149	0.8	0.74	0.104978
SLC6A1-AS1	0.402361	-1.04655	0.967	0.839	1
SLC6A12	0.932598	-1.05547	0.953	0.825	1
HIGD1B	0.000113329	-1.07785	0.791	0.87	0.126022
ABCC9	0.0410929	-1.08305	0.991	0.776	1
AC092957.1	4.9e-11	-1.0832	0.74	0.879	5.45e-08
SLC12A7	0.167706	-1.28196	0.981	0.771	1
APOD	0.472233	-1.89348	0.93	0.874	1

## Sheet: Supplementary Table 8
Supplementary Table 8 :The differentially expressed genes for Endo from stage2 versus stage3
	p_val	avg_log2FC	pct.1	pct.2	p_val_adj
BICC1	0.00021809	0.697247	0.807	0.82	0.242516
ELOVL7	0.0761354	0.618725	0.776	0.769	1
RNF220	1.59e-06	0.557349	0.61	0.476	0.00176692
ZBTB20	0.109038	0.532384	0.901	0.904	1
ST6GALNAC3	0.00075741	0.520872	0.857	0.817	0.84224
APOD	0.032786	0.47975	0.874	0.969	1
PRKG1	0.0371097	0.47632	0.592	0.614	1
LRCH1	0.00281959	0.457822	0.614	0.572	1
DSCAM	7.72e-07	0.449958	0.265	0.31	0.000858546
ABCA6	0.00118798	0.445909	0.785	0.713	1
GRM3	0.0276824	0.445139	0.502	0.755	1
AC092957.1	0.00367551	0.442305	0.879	0.955	1
RERGL	0.333488	0.433748	0.78	0.992	1
PDZRN3	1.34e-05	0.431654	0.713	0.603	0.0149085
GRID2	0.212942	0.430949	0.619	0.662	1
CNKSR2	0.00013941	0.406403	0.686	0.789	0.155024
LHFPL6	0.00536986	0.401626	0.919	0.868	1
ITGA1	0.0130019	0.396944	0.673	0.685	1
CGNL1	2.92e-06	0.39584	0.704	0.572	0.00325193
DISC1	0.864298	0.393319	0.417	0.58	1
SRGAP2	9.37e-05	0.392831	0.61	0.631	0.104198
ZFP36L1	0.024135	0.385201	0.74	0.715	1
PHLPP1	1.59e-05	0.381035	0.762	0.606	0.0177055
CEMIP	0.262878	0.374992	0.852	0.952	1
UTRN	0.00789373	0.37041	0.744	0.724	1
SLC12A7	0.134614	0.368286	0.771	0.899	1
FOXO1	0.576667	0.363642	0.731	0.783	1
PDE1C	0.258547	0.361878	0.7	0.73	1
ABCA9	0.602786	0.360747	0.713	0.789	1
NAMPT	0.0515343	0.354805	0.825	0.792	1
LINC01515	8.53e-07	0.348152	0.587	0.732	0.000948739
CADPS2	7.81e-05	0.339626	0.614	0.552	0.0868149
SLC6A13	0.0203698	0.339181	0.709	0.611	1
HSPA5	0.00147948	0.337048	0.587	0.786	1
SLIT3	8.01e-09	0.332652	0.291	0.22	8.9e-06
IQGAP2	0.65495	0.326017	0.547	0.645	1
THSD4	0.153835	0.325244	0.731	0.645	1
SEMA5A	0.877597	0.323168	0.771	0.893	1
TBX18	0.000204548	0.318272	0.48	0.808	0.227457
TNFAIP8	0.294632	0.31598	0.731	0.634	1
LEF1	0.000390493	0.31345	0.713	0.673	0.434228
AF279873.3	7.54e-14	0.312941	0.713	0.465	8.39e-11
BGN	0.965308	0.310549	0.65	0.715	1
SLCO1A2	5.04e-07	0.308612	0.713	0.456	0.000560886
A2M	0.372474	0.299314	0.767	0.921	1
TRPC3	0.92499	0.295015	0.843	0.966	1
EPS8	0.00204003	0.293164	0.839	0.696	1
FGF13	0.48008	0.292255	0.753	0.8	1
SHROOM3	0.179674	0.279784	0.731	0.732	1
TRPS1	6.19e-05	0.278621	0.605	0.524	0.0688467
EMP2	0.000273009	0.278288	0.686	0.885	0.303586
KAT2B	0.238183	0.278049	0.466	0.439	1
MYOF	0.289256	0.276262	0.65	0.62	1
COBLL1	0.00451497	0.273571	0.776	0.766	1
EDIL3	0.401095	0.273308	0.758	0.806	1
EBF1	0.0145371	0.269771	0.897	0.831	1
SATB2	0.000543907	0.269321	0.803	0.949	0.604825
SAT1	0.102827	0.261383	0.744	0.724	1
CTSC	0.0164027	0.2612	0.655	0.977	1
STK33	6.68e-07	0.260015	0.614	0.775	0.000742819
ITIH5	0.119469	0.259751	0.74	0.777	1
UACA	6.79e-05	0.258653	0.758	0.665	0.0755361
HIP1	3.42e-05	0.25367	0.341	0.335	0.038075
CDC14A	8.5e-16	0.252147	0.7	0.4	9.45e-13
LDLRAD3	0.0708056	0.251256	0.807	0.828	1
PDLIM5	0.777587	-0.251411	0.507	0.58	1
CMTM8	0.344041	-0.251671	0.422	0.53	1
LINGO2	6.69e-10	-0.252166	0.372	0.217	7.44e-07
LINC01266	1.68e-07	-0.252944	0.175	0.428	0.000187315
DTNA	0.491954	-0.253152	0.861	0.828	1
CD55	0.00159715	-0.253672	0.166	0.346	1
PCDH11X	0.816589	-0.253841	0.157	0.33	1
PCDH11Y	0.293445	-0.254209	0.785	0.862	1
APOE	6.56e-06	-0.255587	0.717	0.808	0.00728984
NDRG2	0.104903	-0.256407	0.578	0.648	1
BNC2	2.67e-08	-0.25719	0.448	0.245	2.97e-05
KCTD8	0.27258	-0.260311	0.592	0.659	1
SGK1	0.0109792	-0.261948	0.426	0.499	1
ZFP36L2	0.00229501	-0.262149	0.314	0.375	1
ARHGAP22	0.000196561	-0.263518	0.265	0.617	0.218576
AC087564.1	1.74e-05	-0.264408	0.798	0.93	0.0193719
F13A1	0.0250029	-0.269683	0.798	0.78	1
PTH1R	0.494872	-0.270232	0.466	0.659	1
SNTG2	2.03e-20	-0.270362	0.175	0.293	2.26e-17
ZNF366	0.23723	-0.270401	0.13	0.403	1
PTN	0.00324362	-0.270502	0.87	0.997	1
MSI2	0.0150992	-0.272249	0.753	0.921	1
TOX	2.06e-08	-0.273036	0.574	0.417	2.29e-05
PLA2G16	0.174426	-0.273568	0.498	0.687	1
SLC25A18	1.99e-08	-0.274314	0.821	0.485	2.21e-05
TBXAS1	0.946528	-0.2747	0.422	0.375	1
RGS5	0.953893	-0.278237	0.861	0.938	1
DLC1	0.796894	-0.280164	0.744	0.763	1
GHR	8.66e-08	-0.282519	0.87	0.955	9.63e-05
L3MBTL4	5.49e-19	-0.282738	0.372	0.831	6.1e-16
AC008415.1	1.78e-12	-0.282796	0.17	0.715	1.98e-09
RIPOR3	0.00198133	-0.288398	0.345	0.606	1
SRGN	2.5e-09	-0.288601	0.462	0.755	2.78e-06
ADGRV1	0.076295	-0.290675	0.803	0.707	1
BMPR1B	4.08e-15	-0.29214	0.74	0.831	4.53e-12
PGM5	0.240644	-0.294785	0.336	0.479	1
ERBIN	0.0919896	-0.299098	0.762	0.856	1
AC011287.1	0.0120891	-0.299897	0.211	0.462	1
TGM2	0.176382	-0.303007	0.646	0.566	1
TMEM165	0.0219354	-0.31019	0.336	0.417	1
CD36	6.16e-05	-0.310223	0.157	0.282	0.0684926
SLC6A1	0.26444	-0.311413	0.901	0.963	1
SNTG1	4.37e-05	-0.31434	0.435	0.631	0.04865
SH3RF3	0.00182981	-0.320569	0.363	0.507	1
LINC02172	0.215338	-0.32218	0.448	0.634	1
KCNH8	1.15e-17	-0.323204	0.211	0.713	1.28e-14
PDE10A	0.929052	-0.32477	0.65	0.6	1
APOLD1	0.384917	-0.324844	0.462	0.577	1
CHST11	2.85e-12	-0.333217	0.547	0.879	3.17e-09
TFRC	4.19e-11	-0.336336	0.592	0.856	4.66e-08
CDH20	1.77e-05	-0.341714	0.57	0.806	0.0196464
TF	1.82e-08	-0.343208	0.274	0.315	2.02e-05
CDH13	2.1e-07	-0.343314	0.278	0.22	0.000233653
COL4A1	0.00247387	-0.347663	0.413	0.606	1
C22orf34	1.02e-06	-0.347701	0.475	0.639	0.00113217
CTSB	0.0172651	-0.347838	0.435	0.603	1
CYSLTR2	0.819019	-0.349792	0.426	0.431	1
NKAIN3	0.139431	-0.355391	0.7	0.589	1
ENC1	4.64e-07	-0.358007	0.771	0.93	0.000516461
MBP	1.69e-08	-0.36249	0.489	0.431	1.88e-05
COL4A2	0.988568	-0.366353	0.323	0.47	1
ADAMTS6	1.9e-05	-0.36636	0.709	0.586	0.0210931
ADAMTS9	0.0169723	-0.367963	0.314	0.507	1
ITPKB	0.000608009	-0.36803	0.498	0.487	0.676106
IGFBP7	0.0168004	-0.369657	0.65	0.848	1
RNF219-AS1	0.342228	-0.369905	0.816	0.794	1
COL6A2	0.667689	-0.370355	0.726	0.831	1
TNIK	0.571426	-0.378199	0.543	0.732	1
VWF	0.442752	-0.37875	0.753	0.828	1
TPD52L1	9.41e-06	-0.381762	0.242	0.383	0.01046
CLMN	0.363197	-0.382172	0.686	0.792	1
PCLO	1.8e-08	-0.403657	0.215	0.572	2e-05
LIMS2	0.00124867	-0.403787	0.637	0.82	1
CASC15	0.285119	-0.419583	0.803	0.735	1
ENG	0.00224775	-0.422181	0.704	0.842	1
MAN1A1	7.34e-06	-0.443676	0.511	0.825	0.00816084
ZNF521	0.000317558	-0.448854	0.574	0.761	0.353125
PODXL	0.0284781	-0.478172	0.798	0.856	1
IFITM3	0.0321227	-0.492513	0.798	0.958	1
MT2A	0.421195	-0.529546	0.87	0.944	1
HES4	0.00131212	-0.548514	0.825	0.955	1
TSHZ2	0.285759	-0.569242	0.422	0.448	1
FAM107A	0.19297	-0.603111	0.547	0.637	1
ADGRD1	0.00192586	-0.635997	0.753	0.913	1
GFAP	0.0913006	-0.636914	0.848	0.839	1
B2M	0.000955455	-0.68628	0.901	0.98	1
ATP1A2	0.185607	-0.765793	0.87	0.901	1
NRGN	3.26e-09	-0.784778	0.874	0.997	3.62e-06
ID1	0.0227815	-0.837854	0.839	0.949	1
TMSB10	0.000162939	-1.0668	0.933	0.994	0.181188

## Sheet: Supplementary Table 9
Supplementary Table 9 :The differentially expressed genes for Ex from stage1 versus stage2
	p_val	avg_log2FC	pct.1	pct.2	p_val_adj
NEFM	2.29e-09	0.959219	0.61	0.488	2.54e-06
NRGN	0.603558	0.898602	1	0.909	1
CCK	4.46e-106	0.812897	0.883	0.623	4.96e-103
ENC1	8.19e-24	0.754337	0.866	0.71	9.1e-21
CACNA2D3	2.68e-53	0.744717	0.91	0.843	2.98e-50
GPM6A	4.83e-28	0.743291	0.971	0.932	5.37e-25
AC011287.1	0.568018	0.660458	0.842	0.697	1
MBP	2.09e-46	0.65758	0.812	0.632	2.32e-43
LDB2	1.01e-77	0.639348	0.965	0.914	1.12e-74
SCG2	3.35e-22	0.622937	0.581	0.371	3.73e-19
CNTNAP2	7.44e-40	0.613176	0.994	0.97	8.27e-37
CA10	2.62e-22	0.589694	0.881	0.688	2.91e-19
NELL2	8.25e-73	0.588568	0.957	0.868	9.17e-70
NPY	4.31e-15	0.542965	0.533	0.217	4.79e-12
GALNTL6	0.000219209	0.528563	0.965	0.806	0.24376
SLC8A1	6.1e-72	0.521936	0.996	0.935	6.78e-69
DSCAM	9.39e-127	0.516606	0.964	0.909	1.04e-123
CNKSR2	5.21e-82	0.493013	0.966	0.872	5.79e-79
GRIK2	3.78e-107	0.486917	0.849	0.833	4.2e-104
SLC24A2	8.72e-12	0.485784	0.987	0.832	9.7e-09
TMEM132D	6.02e-34	0.480798	0.9	0.789	6.69e-31
ERBB4	1.35e-254	0.472563	0.822	0.485	1.5e-251
ST6GALNAC5	9.45e-28	0.47228	0.929	0.802	1.05e-24
CTNNA2	2.09e-101	0.458318	0.972	0.938	2.32e-98
KCTD16	7.11e-30	0.453424	0.941	0.809	7.91e-27
GRID2	0.0475785	0.449703	0.947	0.785	1
LRFN5	6.39e-176	0.449013	0.909	0.882	7.11e-173
CDH13	0.159337	0.444448	0.798	0.635	1
GRIA3	3.91e-26	0.444111	0.962	0.837	4.35e-23
SLC1A2	2.86e-270	0.434092	0.937	0.573	3.18e-267
CXCL14	7.68e-07	0.433989	0.478	0.29	0.000853871
DPYD	2.91e-09	0.433623	0.899	0.738	3.23e-06
ABLIM1	0.0209262	0.433569	0.828	0.661	1
TNR	6.92e-25	0.431372	0.707	0.654	7.69e-22
TMSB10	3.69e-34	0.417902	0.878	0.743	4.11e-31
IQCJ-SCHIP1	1.92e-67	0.417537	0.927	0.921	2.14e-64
FRMD4A	5.18e-68	0.412045	0.962	0.944	5.76e-65
CHSY3	5.12e-97	0.411078	0.983	0.881	5.69e-94
PDE10A	3.61e-86	0.409241	0.712	0.727	4.02e-83
HDAC9	0.00164384	0.403272	0.902	0.728	1
KIAA1217	1.76e-18	0.398519	0.907	0.687	1.96e-15
HECW1	7.36e-125	0.397909	0.797	0.815	8.18e-122
AGBL4	5.48e-134	0.393941	0.814	0.905	6.09e-131
KIRREL3	3.02e-61	0.388219	0.939	0.847	3.36e-58
RAB3C	2.01e-46	0.383012	0.828	0.57	2.23e-43
PRUNE2	8.5e-21	0.379669	0.841	0.621	9.45e-18
DGKB	5.86e-24	0.372615	0.923	0.837	6.52e-21
LRRC4C	6.24e-34	0.371966	0.853	0.806	6.93e-31
DLGAP2	2.72e-178	0.37166	0.995	0.924	3.02e-175
PTPRG	2.88e-46	0.366178	0.882	0.797	3.2e-43
HCN1	4.68e-51	0.363163	0.956	0.839	5.2e-48
QDPR	0	0.360311	0.924	0.579	0
DPP10	1.19e-52	0.359845	0.954	0.913	1.33e-49
RYR3	3.51e-29	0.356882	0.662	0.459	3.9e-26
CADPS2	1.03e-11	0.356334	0.966	0.795	1.14e-08
SLC6A1	1.33e-61	0.350524	0.599	0.362	1.48e-58
SPOCK3	4.94e-248	0.34951	0.967	0.662	5.49e-245
NKAIN2	2.26e-74	0.348964	0.952	0.916	2.52e-71
PCSK2	1.72e-22	0.346608	0.892	0.775	1.91e-19
GALNT17	1.34e-47	0.342205	0.975	0.849	1.49e-44
AC027288.3	1.47e-30	0.34134	0.44	0.377	1.64e-27
SLC44A1	2.69e-08	0.341028	0.953	0.714	2.99e-05
TENM4	5.85e-34	0.340015	0.819	0.726	6.51e-31
ADARB2	1.46e-77	0.337882	0.687	0.484	1.63e-74
LINC02306	0.011511	0.335134	0.796	0.666	1
PDE1A	1.7e-86	0.33378	0.983	0.875	1.89e-83
GPC6	4.65e-14	0.330909	0.885	0.673	5.17e-11
SOX5	0.00949003	0.328945	0.968	0.796	1
NEFH	2.08e-05	0.328665	0.483	0.369	0.0230811
STXBP5L	4.99e-69	0.326934	0.897	0.914	5.55e-66
LINC01250	1.88e-20	0.326219	0.879	0.789	2.09e-17
KCNQ3	8.73e-21	0.321897	0.95	0.809	9.7e-18
SH3RF3	1.55e-37	0.312977	0.756	0.533	1.72e-34
CDH9	0.0472016	0.312951	0.892	0.763	1
EFNA5	1.41e-142	0.312922	0.985	0.9	1.57e-139
UNC5D	2.1e-94	0.301417	0.903	0.843	2.34e-91
KCNMB2-AS1	9.83e-34	0.300002	0.667	0.431	1.09e-30
SHTN1	1.12e-43	0.29963	0.878	0.665	1.25e-40
KHDRBS3	2.07e-134	0.298735	0.789	0.814	2.3e-131
ANO4	2.97e-77	0.298424	0.833	0.565	3.3e-74
CASC15	1.58e-21	0.297675	0.684	0.502	1.76e-18
SLIT3	2.16e-05	0.296554	0.772	0.594	0.0240186
MAPK4	2.15e-110	0.294183	0.833	0.604	2.39e-107
SORBS2	2.45e-52	0.293777	0.839	0.759	2.72e-49
RAB3B	2.66e-63	0.291593	0.596	0.358	2.96e-60
BCAS1	0.156812	0.289882	0.622	0.521	1
SCD5	2.67e-102	0.286578	0.88	0.628	2.97e-99
DENND3	1.15e-113	0.283681	0.782	0.495	1.28e-110
CBLN2	1.03e-07	0.282868	0.783	0.691	0.000114426
ARHGEF28	3.81e-137	0.282771	0.775	0.468	4.23e-134
LINGO2	6.19e-114	0.277428	0.9	0.875	6.89e-111
ROBO2	1.77e-29	0.265421	0.804	0.797	1.97e-26
GAD1	2.09e-120	0.26501	0.66	0.329	2.33e-117
ITPR2	2.95e-31	0.262353	0.826	0.572	3.28e-28
DGKG	2.6e-116	0.260336	0.854	0.552	2.89e-113
SFXN5	1.76e-139	0.257669	0.913	0.597	1.96e-136
GRIK1	3.09e-85	0.256861	0.705	0.49	3.44e-82
DTNA	1.58e-49	0.255583	0.957	0.828	1.76e-46
GRM1	0.0380016	0.253101	0.965	0.749	1
APOE	0	-0.288073	0.972	0.459	0
FOXP2	3.29e-05	-0.294276	0.812	0.585	0.0365807
TSHZ2	1.81e-24	-0.332283	0.924	0.695	2.01e-21
GPC5	1.87e-05	-0.358565	0.847	0.696	0.0208345
PCDH11X	2.01e-22	-0.394852	0.989	0.741	2.24e-19
AC109466.1	3.76e-46	-0.466305	0.966	0.668	4.18e-43

## Sheet: Supplementary Table 10
Supplementary Table 10 :The differentially expressed genes for Ex from stage2 versus stage3
	p_val	avg_log2FC	pct.1	pct.2	p_val_adj
ERBB4	1.99e-09	0.648955	0.485	0.659	2.21e-06
PLP1	1.13e-43	0.486617	0.653	0.827	1.25e-40
CST3	5.06e-71	0.483392	0.533	0.8	5.63e-68
DGKB	1.84e-05	0.403408	0.837	0.939	0.0204739
CBLN2	0.407312	0.397699	0.691	0.788	1
SLC1A2	7.42e-24	0.37116	0.573	0.777	8.25e-21
NPAS3	2.17e-05	0.370814	0.729	0.855	0.0240851
GALNTL6	0.00343771	0.360722	0.806	0.91	1
NRGN	2.57e-15	0.35246	0.909	0.98	2.85e-12
HSPA5	7.34e-17	0.336235	0.538	0.721	8.16e-14
MBP	0.27535	0.326305	0.632	0.737	1
TMSB10	4.54e-12	0.321216	0.743	0.924	5.05e-09
KCTD16	3.99e-05	0.313228	0.809	0.883	0.0443856
ST6GALNAC5	0.00350302	0.309354	0.802	0.836	1
CA10	3.46e-13	0.297396	0.688	0.809	3.85e-10
CDH13	0.00338274	0.293406	0.635	0.677	1
GPC6	3.39e-07	0.291253	0.673	0.802	0.00037723
ATP1A2	6.68e-23	0.286221	0.489	0.709	7.43e-20
THSD7A	1.12e-22	0.28618	0.54	0.734	1.24e-19
PTPRO	0.00325547	0.285709	0.634	0.752	1
GLUL	1e-08	0.280743	0.483	0.583	1.11e-05
ENC1	0.000112454	0.271139	0.71	0.809	0.125049
STXBP5L	4.06e-07	0.268832	0.914	0.939	0.000451945
APOE	6e-28	0.268082	0.459	0.672	6.67e-25
GRID2	0.0522363	0.252149	0.785	0.837	1
HS3ST4	1.62e-06	-0.257124	0.661	0.703	0.00179672

[truncated: 10 more sheets: Supplementary Table 11, Supplementary Table 12, Supplementary Table 13, Supplementary Table 14, Supplementary Table 15, Supplementary Table 16, Supplementary Table 17, Supplementary Table 18, Supplementary Table 19, Supplementary Table 20]
